# Supplementary material for: Combining a ligand photogenerator and a Ru precatalyst: a photoinduced approach to cross-linked ROMP polymer films
Source: PubMed Central journal article supplement — RSC Adv. 2019 Sep 4;9(48):27789–99. doi: 10.1039/c9ra05831a (PMC9070792; doi:10.1039/c9ra05831a), 2019-09-04
Supplement: RA-009-C9RA05831A-s001.pdf [file RA-009-C9RA05831A-s001.pdf]

Electronic Supplementary Material (ESI) for Physical Chemistry Chemical Physics.  
This journal is © the Owner Societies 2019

## † Electronic Supporting information to

### **Combining a Ligand Photogenerator and a Ru Precatalyst: A Photoinduced Approach to Cross-linked ROMP Polymer Films**

Thi Kim Hoang Trinh,<sup>a,b</sup> Gautier Schrodj,<sup>a,b</sup> Séverinne Rigolet,<sup>a,b</sup> Julien Pinaud,<sup>c</sup> Patrick Lacroix-Desmazes,<sup>c</sup> Loïc Pichavant,<sup>d</sup> Valérie Héroguez,<sup>d</sup> Abraham Chemtob<sup>\*a,b</sup>

#### **Table of contents**

|                                        |          |
|----------------------------------------|----------|
| <b>I. ADDITIONAL EXPERIMENTS .....</b> | <b>2</b> |
| <b>II. ADDITIONAL FIGURES .....</b>    | <b>2</b> |
| <b>III. REFERENCES .....</b>           | <b>4</b> |

---

<sup>a</sup>Institut de Science des Matériaux de Mulhouse, IS2M UMR 7361 CNRS, Université de Haute-Alsace, Mulhouse, France.

<sup>b</sup>Université de Strasbourg, Strasbourg, France.

<sup>c</sup>ICGM, Université de Montpellier, CNRS, ENSCM, Montpellier, France.

<sup>d</sup>Université de Bordeaux, CNRS, Bordeaux INP, LCPO, UMR 5629, F-33600, Pessac, France.

## I. Additional Experiments

### Preparation of the active metathesis catalyst (*p*-cymene)RuCl<sub>2</sub>(IMes) (Ru-1-IMes).

Noels' complex starting from Ru-1 and IMes was synthesized based on a protocol developed by Nolan *et al.*<sup>1</sup> <sup>1</sup>H NMR (400 MHz, THF-*d*<sub>8</sub>). Chemical shift: 1.08 (d, *J* = 7 Hz, 6H, CH(CH<sub>3</sub>)<sub>2</sub>), 1.75 (s, 3H, CH<sub>3</sub>), 2.22 (s, 12H, Mes-2,6-CH<sub>3</sub>), 2.31 (s, 6H, Mes-4-CH<sub>3</sub>), 2.46 (m, 1H, CH(CH<sub>3</sub>)<sub>2</sub>), 4.55 (d, *J* = 6 Hz, 2H, C<sub>6</sub>H<sub>4</sub>), 5.00 (d, *J* = 5.8 Hz, 2H, C<sub>6</sub>H<sub>4</sub>), 6.90 (m, 4H, Mes-3,5-H), 7.05 (s, 2H, NCHCHN).

## II. Additional Figures

### 1. NHC photogeneration and structure of the active ROMP catalyst

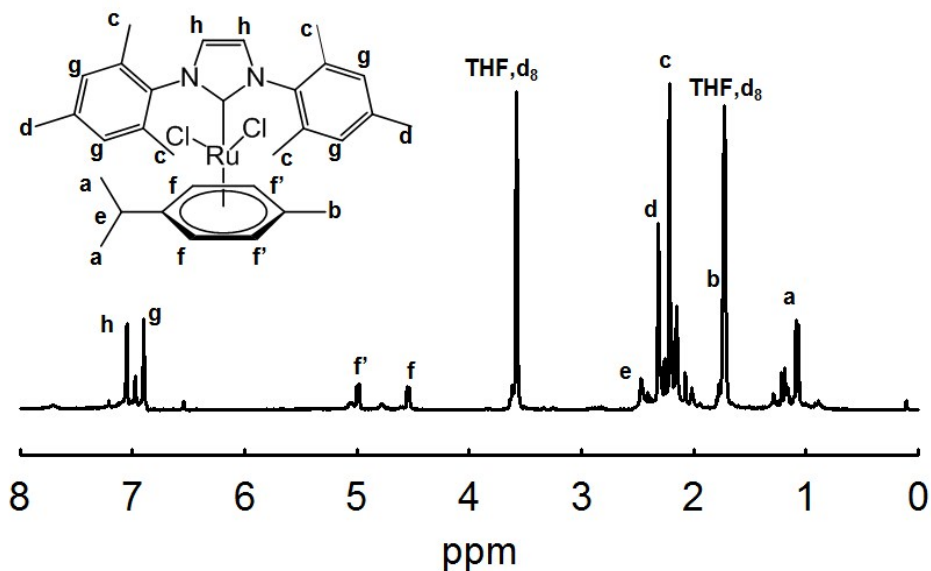

**Figure S1.** <sup>1</sup>H NMR spectrum of the reaction medium after reaction of [(*p*-cymene)RuCl<sub>2</sub>]<sub>2</sub> (Ru-1, 1 equiv.) with IMes (2.02 equiv.) in THF-*d*<sub>8</sub> ([Ru-1] = 0.05 M).

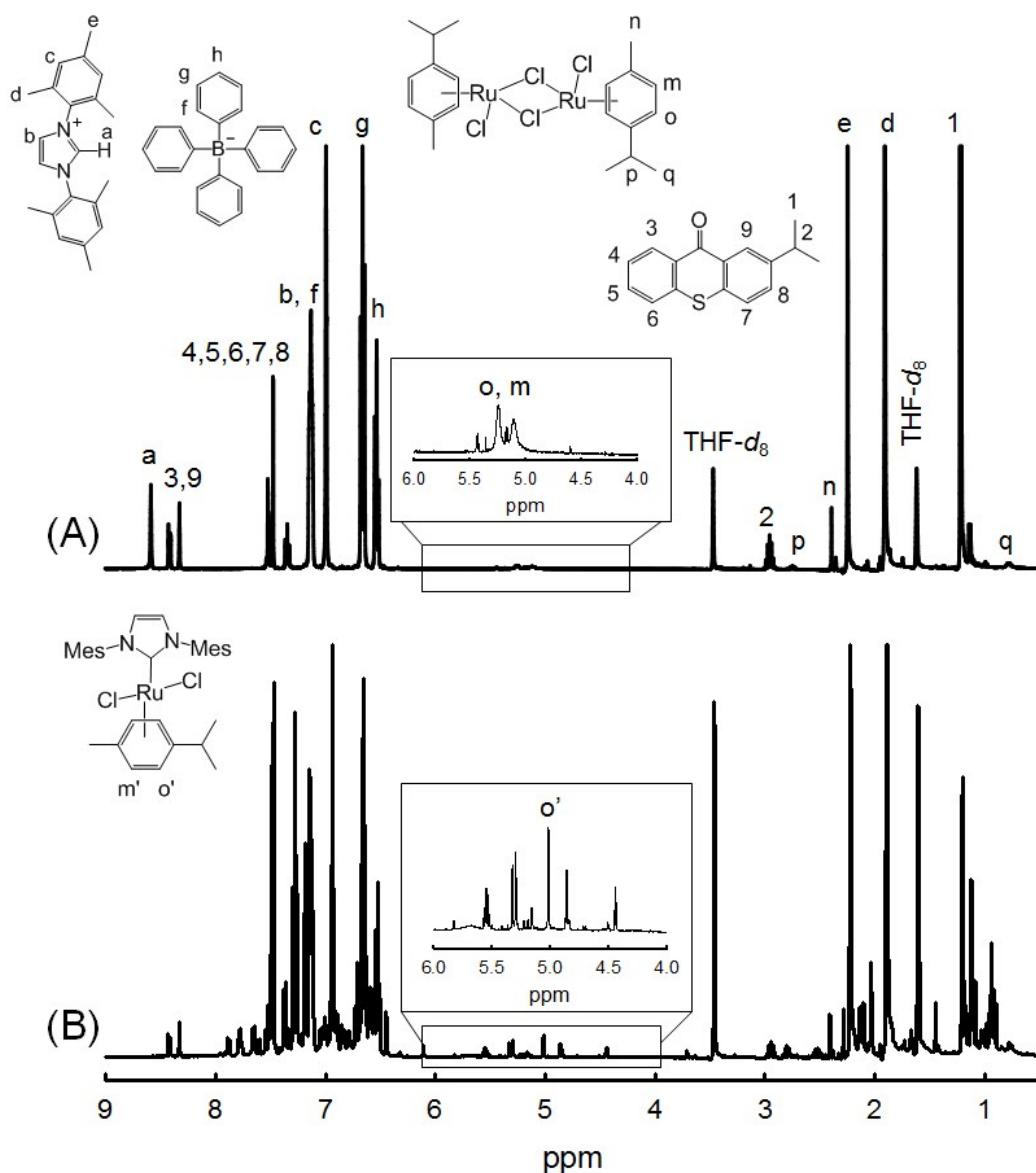

**Figure S2.**  $^1\text{H}$  NMR of  $1/\text{Ru-1}/\text{ITX}$  in  $\text{THF-}d_8$ : (a) Prior to exposure to light and (b) After 30 min of irradiation (Conditions: see experimental section).

## 2. Photoactivated ROMP in solution

The reaction process was performed under similar conditions to those described for NB, except for irradiation time that was extended to 10 min. Indeed, we expect that a functional NB derivative such as ENB would be less reactive due to a greater steric crowding. Accordingly, only 64 % conversion was achieved after 10 min irradiation at 365 nm and lower  $M_n$  values were obtained (*entry a*) (Table S1). The influence of sensitizer concentration (*entry b*), excitation wavelength (*entry c*) and precatalyst nature (*entries d-e*) are consistent with the previous observations.

**Table S1.** Photopolymerization results of ENB using Ru dimer/**IMesH<sup>+</sup>BPh<sub>4</sub><sup>-</sup>**/ITX photoinitiating system in CD<sub>2</sub>Cl<sub>2</sub> ([ENB] = 1 M, 510 equiv.). Irradiation conditions: 365 nm, 6.5 mW·cm<sup>-2</sup>, 10 min

| Entry                | Precatalyst | Precatalyst/ <b>1</b> /ITX (equiv.) | Conv. <sup>a</sup> (%) | $M_{n-th}^c$ (kg·mol <sup>-1</sup> ) | $M_{n-SEC}^d$ (kg·mol <sup>-1</sup> ) | $\bar{D}^d$ |
|----------------------|-------------|-------------------------------------|------------------------|--------------------------------------|---------------------------------------|-------------|
| <i>a</i>             | <b>Ru-1</b> | 1/5/2.5                             | 64                     | 20                                   | 37.9                                  | 5.6         |
| <i>b</i>             | <b>Ru-1</b> | 1/5/5                               | 84                     | 26                                   | 40.7                                  | 6.0         |
| <i>c<sup>e</sup></i> | <b>Ru-1</b> | 1/5/2.5                             | 11                     | 3                                    | 28.1                                  | 4.6         |
| <i>d</i>             | <b>Ru-2</b> | 1/5/2.5                             | 71                     | 22                                   | 55.6                                  | 2.7         |
| <i>e</i>             | <b>Ru-3</b> | 1/5/2.5                             | 78                     | 24                                   | 31.6                                  | 4.7         |

<sup>a</sup> Determined by <sup>1</sup>H-NMR. <sup>b</sup> Calculated from <sup>1</sup>H-NMR spectrum, <sup>c</sup> Theoretical number average molar mass  $M_{n-th} = \frac{Conv. \times [NB] \times M_{NB}}{2 \times [Ru - 1]}$ , <sup>d</sup> Experimental number average molar mass  $M_{n-th}$  obtained by SEC, <sup>e</sup> Irradiation at 405 nm, 4.7 mW cm<sup>-2</sup>, 10 min.

### III. References

1 L. Jafarpour, J. Huang, E. D. Stevens and S. P. Nolan, *Organometallics*, 1999, **18**, 3760–3763.
